# Supplementary material for: Snow mechanical properties variability at the slope scale, implication for snow mechanical modeling
Source: Copernicus journal article supplement (doi:10.5194/egusphere-2023-1586), 2023-08-11
Supplement: Supplementary file [file egusphere-2023-1586-AC1-supplement.pdf]

Dear editor and reviewer 1,

Here is our response to your very helpful and constructive comment in blue. We responded point by point for every major and specific comments.

## General comments

This paper explores slope-scale patterns in snowpack stability. Four field surveys were conducted at different locations where snowpack properties were measured with a snow micropenetrometer and terrain properties were measured with a UAV. Three snowpack properties (slab depth, slab density, weak layer strength) and three stability indices (skier crack length, critical crack length, skier stability index) were derived from the SMP measurements, and their spatial patterns were explored with variogram analyses. Terrain properties (slope angle, convexity, etc.) were used to fit regression models to predict stability patterns across the slopes and explore which terrain factors were most influential. The results suggest slab properties were more variable than weak layer properties and recommend ways slab variability could be accounted for in mechanical models of avalanche release.

The study is well designed, relevant, and interesting; however, I think its presentation needs to be improved before publication in the Cryosphere. Some of the methods and concepts are not described in sufficient detail, the use of terminology and symbols should be more consistent and organized, and the overall contribution and relevance of the study should be clarified.

## Specific comments

- **Novelty of research methods.** Line 105 states “no studies have linked snow stability and mechanical properties with microtopography indicators in spatial modeling”, but I would argue that Reuter et al. (2016) perform a similar study where SMP data was used to spatially predict a failure initialization criteria and critical crack length based on terrain and snowpack data. While the specific properties and terrain predictors differ, as do the type of regression models, the methods are conceptually quite similar. Sect 4.3 of that study specifically discusses spatial prediction of stability indices. I think the similarities and differences between this study and previous studies needs to be clearer in the Introduction (several distinctions are made throughout the section, but not presented in a complete succinct way that links to their objective), and any relevant comparisons with past studies should be added to the Discussion.
  - This work was inspired by the work of Reuter et al. (2016) and motivated us to continue their incredible work. We were inspired by the reading the paper and we based our work on their limitations and suggestions. We added a sentence before the objective to state that these two study are conceptually similar:
  - “This study was inspired by the limitations and suggestions of Reuter et al. (2016), who was able to predict the spatial variation of two stability metrics

with topographic indicators such as slope, aspect and elevation. Here we attempt to predict the spatial variation at a smaller scale using microtopographic indicators with a non-linear regression.”

- **Incomplete methods.** Methods section 2.5 does not describe how the covariates were derived or how the GAM models were fit to the data in enough detail to reproduce the study. The technical comments below list some specific examples.
  - We responded to every specific comment below, but in general, several sentences were added to this section to explain and describe in more details how the covariates were derived.
- **Description of terrain variables.** The microtopographic indicators (covariates) are not sufficiently described. The topographic position index and vector ruggedness measure are not common terms used to describe avalanche terrain and should be described with plain language interpretations. It’s difficult to interpret why these were significant explanatory variables without understanding what they represent. Similarly, some of the other terrain variables are not described in enough detail to understand how they were derived or how to interpret them (e.g., wind-exposure index).
  - We added two sentences to describe the TPI and the VRM
  - “The topographic position index TPI is a slope descriptor indicating ridges, valleys or slopes at a given scale, it refers to the position in elevation relative to the neighbor cells Weiss et al. (2001). The vector ruggedness measure indicates the ruggedness of the terrain independently of the slope and aspect. The ruggedness is derived with the sum of elevation differences with the neighbor cells, but then decoupled with the slope and aspect, meaning that both a flat and steep slope could be homogeneous with low ruggedness Sappington et al. (2007)”.
- **Relating results to terrain/snowpack influences.** A strength of this study is that it was conducted at multiple sites with different terrain and snowpack characteristics. I think the results could be more impactful if the influence of these characteristics were discussed in more detail. For example, what were the main differences between the wind-exposed versus forested slopes and persistent versus non-persistent weak layer grains? Understanding how these factors influence slope-scale variability would be directly relevant to avalanche risk management.
  - We originally wanted to make that comparison but unfortunately, our result and dataset did not show any significant difference between forested areas/ wind-exposed (alpine areas), and also between persistent and non-persistent.
  - We added these sentences in the discussion: “AR22-PP is a wind-exposed study site and, surprisingly, the GAM model did not select the Winstal index  $S_x$  as good predictor. The research distance in  $S_x$  represents the scale of the indicator and the one selected in the study might be too large. Using multiple scales like in the case of TPI and VRM, could change  $S_x$  as a significant covariate at the wind-exposed site (AR22-PP). Unfortunately, no link could be made between our only persistent weak layer survey (JBC22-SH) and the remaining non-persistent weak layer surveys. A bigger dataset

is needed to demonstrate clear differences between alpine/forested areas and persistent/non-persistent weak layers.”

- **Consistency and organization of terms and symbols.** In general, there were quite a few places where consistent and complete use of terminology and symbols needs to be improved. Many examples are provided below.
  - This issues were fixed and specific details are listed below regarding specific technical comments.

## Technical comments

### Abstract/Introduction

- Line 4: True in some contexts, but “can simulate with good accuracy” is better.
  - We added the words “can” to simulate with good accuracy.
- Line 11: These were not “measured” on the slopes but estimated from SMP measurements.
  - We changed the sentences for “were estimated from a high-resolution snow penetrometer (SMP) at multiple locations over several studied slopes”.
- Lines 8-19: Some of these sentences are a little vague (“models suggested significant covariates”) and would benefit with being a little more specific about what types of variables were included in various parts of the study (e.g., “covariance models and scaling properties”) and some plain language interpretations (e.g., what does it mean that “GAM models suggest significant covariates”?).
  - We modified the sentences covariances models and scaling properties for “the covariance models of snow mechanical properties and stability metrics between surveys”.
  - The sentence “GAM models suggest significant covariates” was rephrase with “The use of covariates in GAM models suggested that microtopographic indicators can be used to predict the snow mechanical properties, and with less precision, stability metrics”.
- Line 19: Winstral index as not defined in the abstract, so perhaps use wind-exposure index.
  - This line was removed and the sentences above was added.
- Lines 26-27: Perhaps more general triggers such as “person” instead of “skier” and “stresses from snowfall or warming” instead of just “new snowfall”.
  - This term suggested were added.
- Line 30: The conceptual model decomposes hazard into 4, not 2, factors (problem type, location, size, likelihood).
  - The sentences the conceptual avalanche hazard in North America and in Europe was removed to simplify the introduction.
- Line 44: Is there a word like “depth” missing in “spatial pattern of snow”?
  - We added snow depth.
- Line 48: Can you describe what is meant by “roughness” in a way that links the concept to avalanche release? The interpretation of the fractal distances is unclear in the results.

- We changed the sentence for “characterize the roughness or smoothness of a spatial pattern over multiple scales.”
- Line 52: Start new paragraph here?
  - A new paragraph was started.
- Line 110: Can you briefly describe this “knockdown effect”?
  - We added a sentence to describe the knock-down: “promoting an overall failure of the slope with long-scale spatial variation of snow mechanical properties.”
  - We also added a small sentence to describe the effect on the avalanche release size for consistency.

## Methods

- Line 127: “receives” instead of “received”.
  - Fixed
- Lines 131-136: Please provide consistent details for each site. For example, the text for the site in Quebec does not name it Arete de Roc or provide the abbreviation AR used later in the manuscript, no slope angle is provided for JBC, and shouldn’t “the other site” in line 131 be “the first site”?
  - These inconsistencies were fixed.
- Fig 1: Very nice images to illustrate the study sites. Please add the word “survey” prior to green and red in the caption for consistency.
  - Fixed
- Line 165: Provide a bit more detail about the weak layer criteria. It sounds like one weak layer was identified for each survey, was this the uppermost result in a compression test of any fracture character, the uppermost result with a sudden fracture character, an expert interpretation of the primary layer of concern, or something else?
  - We added a sentence “The weak layer was attributed to uppermost compression tests results which was consistent in both compression tests.”
- Line 167: Please clarify if the winter imagery was collected on the same day as the survey.
  - We added that the winter imagery was taken during the same day.
- Line 181: I would consider layer depth, thickness, and density to be structural rather than mechanical properties.
  - We added structural and macroscopic before the enumeration.
- Line 183: Missing “density” between slab and rho.
  - Fixed
- Line 187: Out of curiosity, does this method of averaging the density of each slab layer account for the varying thicknesses of these layers so that it would be conceptually the same as a bulk density measurement made with a sampling tube, or is this a more abstract slab density?
  - The slab density is not pondered with each layer thickness, which will be the same as a bulk density measurement.
- Line 191: State “... shear strength of the weak layer...” so it is clear this is in reference to how you will derive tau<sub>p</sub>.

- Fixed
- Line 194: Macroscale strength is not defined or explained anywhere, so the justification for this assumption is unclear.
  - We added the symbol next the macroscale strength and (eq.3). Then the link to equation 3 (equation below) is more obvious.
- Fig 2: This figure is helpful but could potentially be simplified with a bit less text (e.g., green boxes) and more consistent formatting (has a mix of serif and sans serif fonts and sizes, bold and non-bold font, why is some text red?).
  - The inconsistencies were fixed and some text were removed for simplicity.
- Line 201: You could consider just saying “the SPI is the ratio of two lengths” rather than “defined by”.
  - Fixed
- Line 207: It’s not clear to me what “the surface beneath the skier” refers to in the definition of alpha.
  - We modified the sentence with “between the point at the snow surface under the skier load to the point of maximum induced shear stress at the weak layer”.
- Eq 6: Missing right bracket at the end of the numerator.
  - Fixed
- Lines 262-264: This sentence is confusing and perhaps belongs later in this section. Aren’t the microtopographic indicators defined by more than the second order derivatives as listed in Table 1? And it’s not clear how these moving windows are applied or relevant to the analysis.
  - We removed this sentence for simplicity.
- Sect 2.4: The fitting of spherical and gaussian variogram models should be described here since they are discussed in the results. Also, the results suggest you pick the best fitting model.
  - We added this sentence : “Four different types of covariance models (Gaussian, Exponential, Spherical, Matern) were fitted to the experimental variogram using iterative reweighted least squares estimation with function fit.variogram from the gstat package in Rstudio (R core,2013) .”
- Sect 2.5.1 and Table 1: Some of the microtopographic indicators could be defined more clearly. Specifically, TPI and VRM should have plain language descriptions because they are not everyday terms used to characterize avalanche terrain with intuitive meanings.
  - We added the sentences : “The topographic position index TPI is a slope descriptor indicating ridges, valleys or slopes at a given scale, it refers to the position in elevation relative to the neighbor cells Weiss et al. (2001). The vector ruggedness measure indicates the ruggedness of the terrain independently of the slope and aspect. The ruggedness is derived with the sum of elevation differences with the neighbor cells, but then decoupled with the slope and aspect, meaning that both a flat and steep slope could be homogeneous with low ruggedness Sappington et al. (2007)”.
- How should canopy height be interpreted if you masked areas with vegetation?

- We added : “we choose to use the canopy height for the influence of shrubs (around 0.3 and 0.5 m) and small trees (around 1 or 2 m) because the snowpack can be up to 3 or 4 m in some areas in JBC and RH. Only trees above 5m were masked from the study sites.”
- How are the concepts of “potential of incoming solar radiation” and “Winstral index” quantified? How was prevailing wind direction determined?
  - We added these sentences: “We selected as covariates the potential of incoming solar radiation, the algorithm simulates over a DSM, the trajectory of the sun in the sky based on the time of the year and the latitude of the study site. The covariate represents direct insolation (shade and sunshine areas), calculated over a month prior to the survey. The Winstral index or upwind maximum slope parameter  $S_x$  represents the shelter or exposure areas provided by the terrain upwind of each pixel (Winstral et al. 2002). The upwind terrain is defined with the maximum search distance and the prevalent wind direction based on the mean wind direction from the nearest weather station of the study sites over the winter.”
- What is meant by moving windows represented with two values such as 5/15 and 25/50?
  - We added this sentence : “The TPI is measured between a minimum radius and a maximum radius with weighted distance from the maximum radius(less important)”.
- Line 284: The symbol  $S_x$  has already been used to describe a slab layer (line 177).
  - We removed  $S_x$  symbol for slab layering.
- Sect 2.5.2: This section is not clear what data is used to fit GAM models. My interpretation is that Y is the 6 properties previously analyzed and the X are the ~13 covariates listed in Table 1. I also assume the model was fit (and cross-validated) using data from the 60-80 SMP profile locations, but this is not stated. While the concepts behind the statistical modelling are explained well, it should be clearer and more explicit how they were applied to this data.
  - The paragraph was restructured following the recommendations suggested above (line 323-331 in the new manuscript).
- Eq 12: The asterisk for multiplication is not necessary.
  - Fixed

## Results

- Fig 3: It would help if the 4 surveys were presented in a consistent order throughout the paper (methods, table 2, figures, etc.). The y-axis is not labelled.
  - The order of the 4 surveys were changed to match the method and Table 2.
  - The units is listed in the title for all plot below for clarity and visual reasons.
- Table 2: Based on the methods,  $3 \times 2 = 6$  compression tests were done with each survey, so why is only a single test reported. Since the tests were performed following Canadian Avalanche Association (2016), they should also be reported following those standards: “CTM 15 (RP) down 25”. How was  $ac\_PST$  derived from PST test results? These don’t seem like cut lengths from a 100 cm long column. The mix

of words and symbols in the column headings is confusing, I suggest using words. Units can be specified in the column headings. Consider separate columns for slab depth and density. Dates should probably be in YYYY-mm-dd format.

- All the comments regarding Table 2 were fixed.
- Line 311: Are the lengths reported for each weak layer the (average) observed grain size with a crystal screen and loupe or the thicknesses derived from SMP measurements?
  - It is the observed grain size on a crystal screen. It is now mentioned in the revised manuscript.
- Line 315: What is meant by the slab is made up of one layer? Doesn't the SMP identify very thin layers?
  - The sentence was corrected : "The slab for this survey is made up of one homogeneous storm snow layer".
- Line 340: "slab thickness" used here but referred to as "slab depth" in other parts of the manuscript. Check manuscript for consistency.
  - Slab depth was removed from the manuscript and replaced for thickness.
- Line 340: Is there any relevant interpretation to gaussian versus spherical variogram models?
  - The sentence was modified to give a relevant interpretation that gaussian model exhibit smoother pattern with lower variance at shorter distances.
  - "The type of variogram models that were fit was mostly spherical and exponential, which exhibit a rapid increase in variance for small distances. These models are typically less smooth than Gaussian models (smaller variance for short distances), which were fitted for slab thickness at JBC22-SH and slab density at JBC22-PP"
- Fig 3: Interesting that AR had some longer correlation lengths given it sounds like it was the most wind exposed site.
  - The correlation length is longer which non intuitive but the variance is also larger which makes more sense for wind exposed site.
- Line 353: "surface roughness" could be misinterpreted to mean the physical texture of the snow surface, which is why I think the interpretation of fractal distances needs to be explained. What does a value of 2.7 mean?
  - We added the sentence in the method section : "The fractal dimension expresses the roughness or complexity of a segment (1-2D), a surface (2-3D), or a volume (3-4D), in a noninteger dimension Gao & Xia (1996)."
  - The word roughness in the result is now changed for complexity.
- Line 360: Please be more specific about what variable or property the "variance" refers to.
  - We added : "of the response variable".
- Fig 6/7: Please explain the grey vegetation in the caption. Consider presenting the RMSE and MAE as rounded values with units to improve interpretability. The prefix "CV" is unnecessary. In general, these are very interesting figures and I agree could be valuable teaching material.
- Line 368: "same" or "similar" variation?
  - We changed same for "a similar".

- Line 370: This sentence is confusing and partly contradictory.
  - We removed this sentence.
- Line 378: This could be the start of a new subsection on microtopographic indicators.
- Table 2 and 3 are not cited in the text. The asterisks next to covariates are not defined, but I assume refer to significance levels.
  - Table 2-3 are now cited in the text and the asterisks are now defined in the table.
- Table 2/3: Interesting that the wind exposure index  $S_x$  was more frequent for the models at the Fidelity sites than the AR site which was apparently more wind exposed. This result could be better understood of the derivation of  $S_x$  was explained better.
  - The derivation of  $S_x$  is now well defined in the method section
- Fig 8: What is meant by “pondered” in the caption. Consider vertical gridlines to make it easier to align the labels with the upper chart.
  - We changed the word pondered to “weighted”.
  - We added a vertical gridlines.

#### Discussion

- Line 388: Again, “variance” of what variables?
  - We added “ of each response variable”.
- Line 395: Should this be “< 0.5”?
  - Fixed
- Line 401: Consider “slope angle” instead of just “slope”.
  - We added slope angle.
- Lines 402-406: These interpretations of TPD and VRM are difficult to understand when these variables have not been described in plain language.
  - TPI and VRM are now more clearly defined in the method section as described above.
- Lines 408-434: These seem to be new results presented in the Discussion section, which is unconventional. Also, the relevance of these comparisons could be introduced initially (instead of lines 435-445) so it is clearer why estimating density and strength from slab depth/thickness is helpful for mechanical models.
  - The Figure was moved in the result section (now Figure 3) and the new dataset is present in the methods sections.
  - We added a supplementary objective in the introduction to make it clear why our results could be helpful for snow mechanical models
- Results were not compared with the similar studies such as Reuter et al. (2016).
  - We added a complete paragraph dedicated to a comparison to Reuter et al. (2016) ( see section 4.1) in the revised manuscript.
- Fig 9: It’s odd to present new datasets in the caption of a discussion figure (EP20, EP19). Also, caption should have plain text names for all symbols presented. The 2 subfigures should be labelled and cited as 9a and 9b. Consider using different colours for the McClung and Bazant curves, it initially appears they are from the same study.



- The Figure was moved in the result section (now Figure 3) and the new dataset is present in the methods sections.
- We added label a et b and change the colour for the Bazant curve.
